# Supplementary material
Source: PubMed Central journal article supplement (PMC4476070)

Uncropped Figure 1c

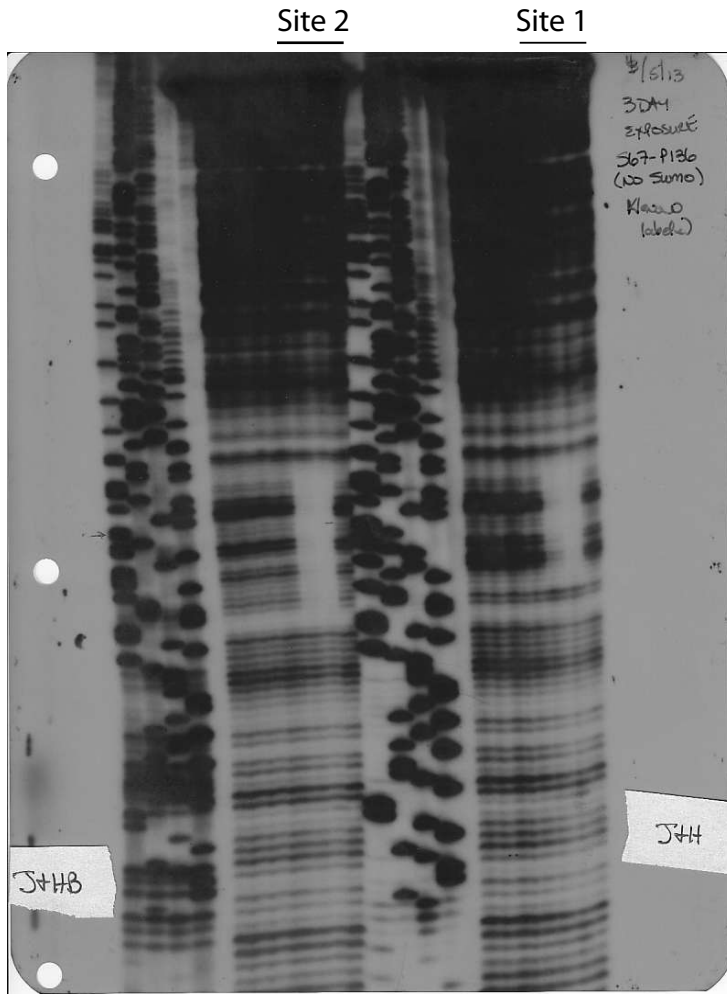

Uncropped Figure 1e

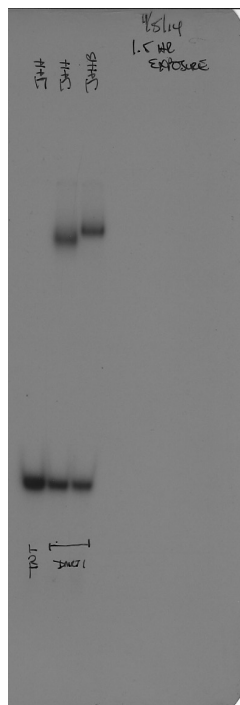

Uncropped Figure 4b and 4c

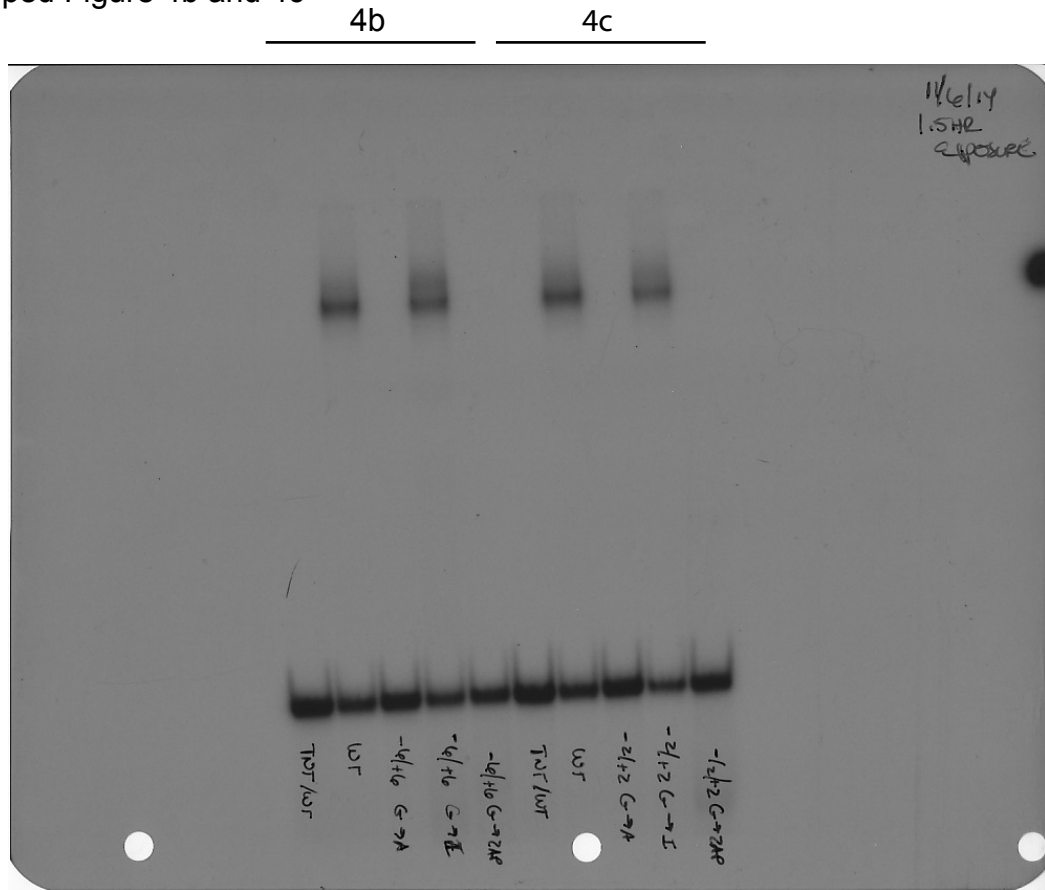

Uncropped Figure 4d and 4e and 7a

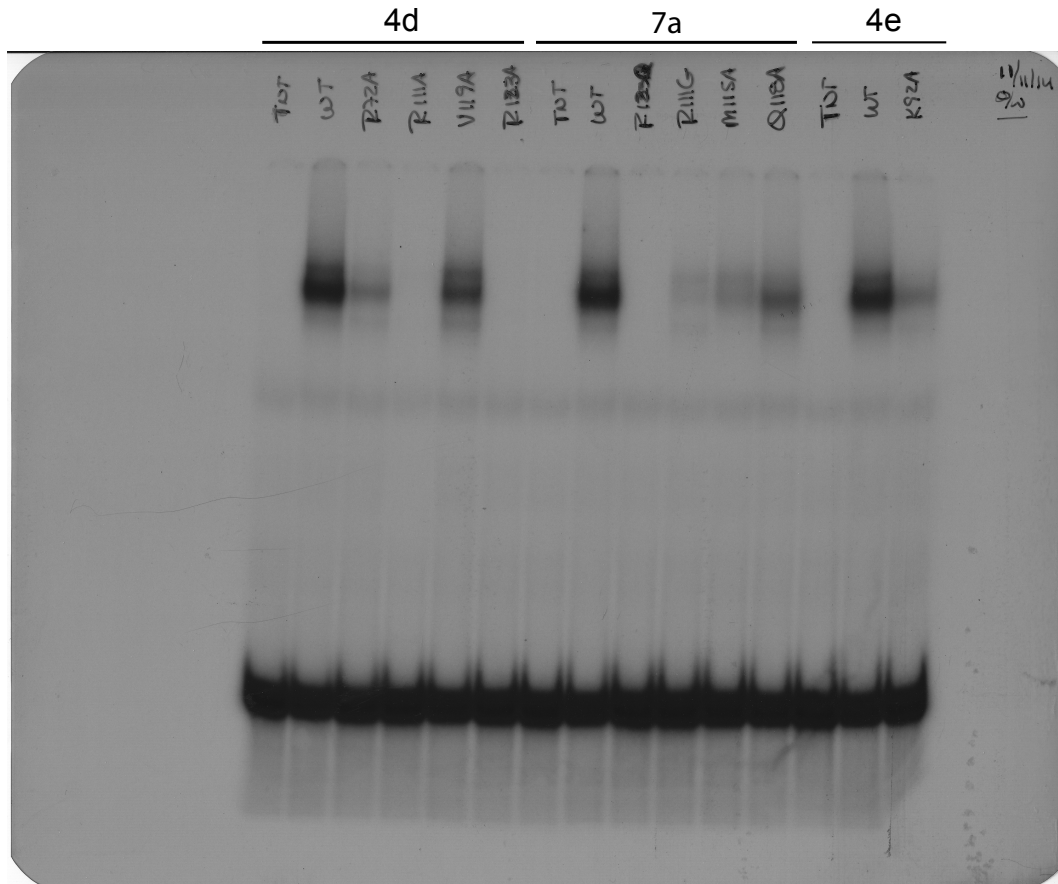

Uncropped Figure 5a

5a

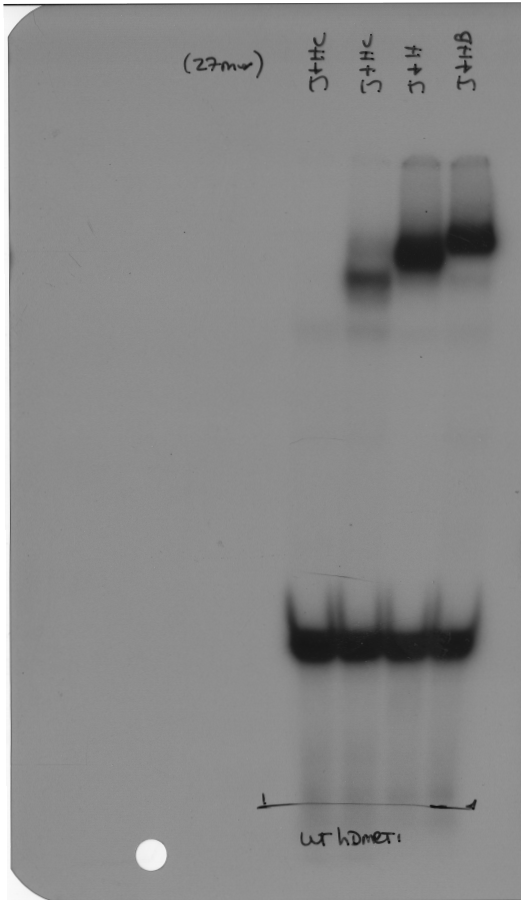

Uncropped Figure 5b

5b left

5b right

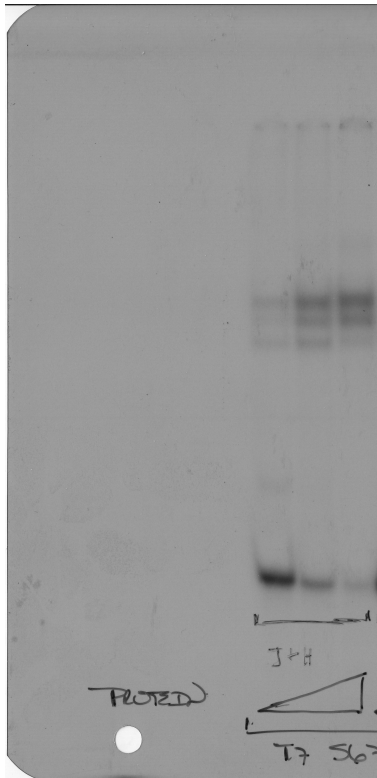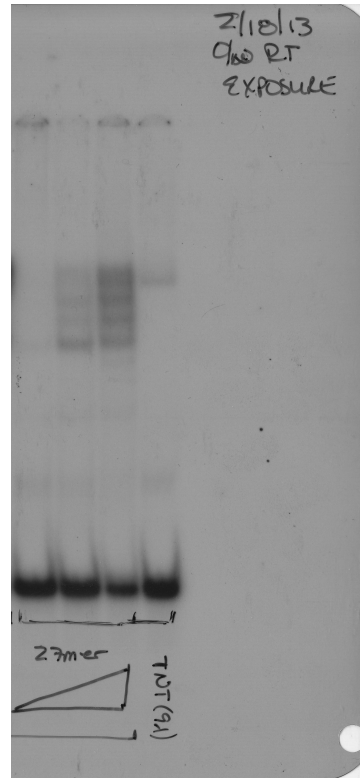

Uncropped Figure 5c

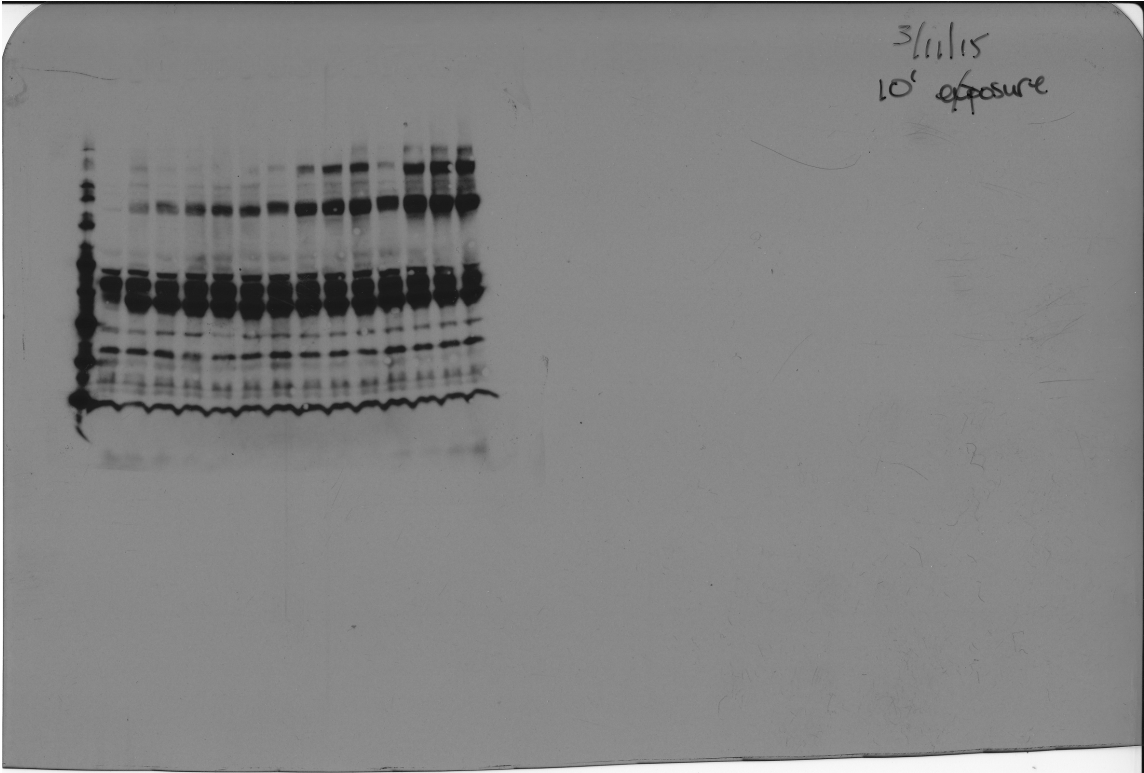

Uncropped Figure 6b

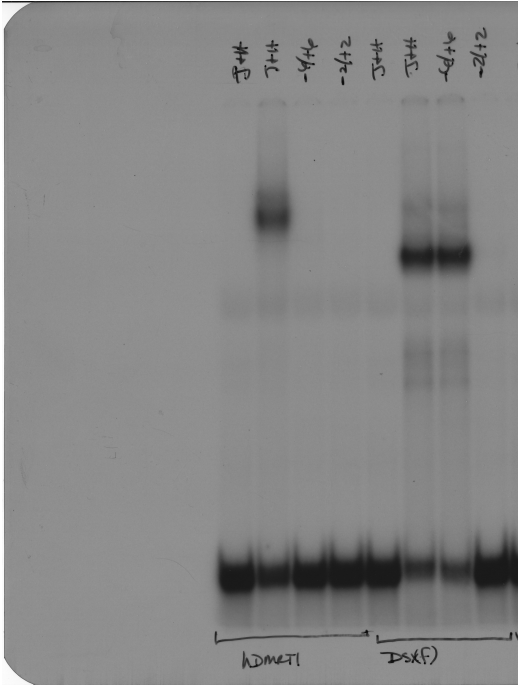

Uncropped Figure 7a is on gel with Figure 4d and 4e

Uncropped Figure 7c

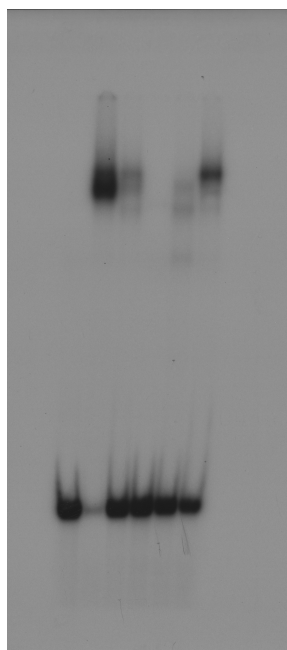

Uncropped Figure 7d

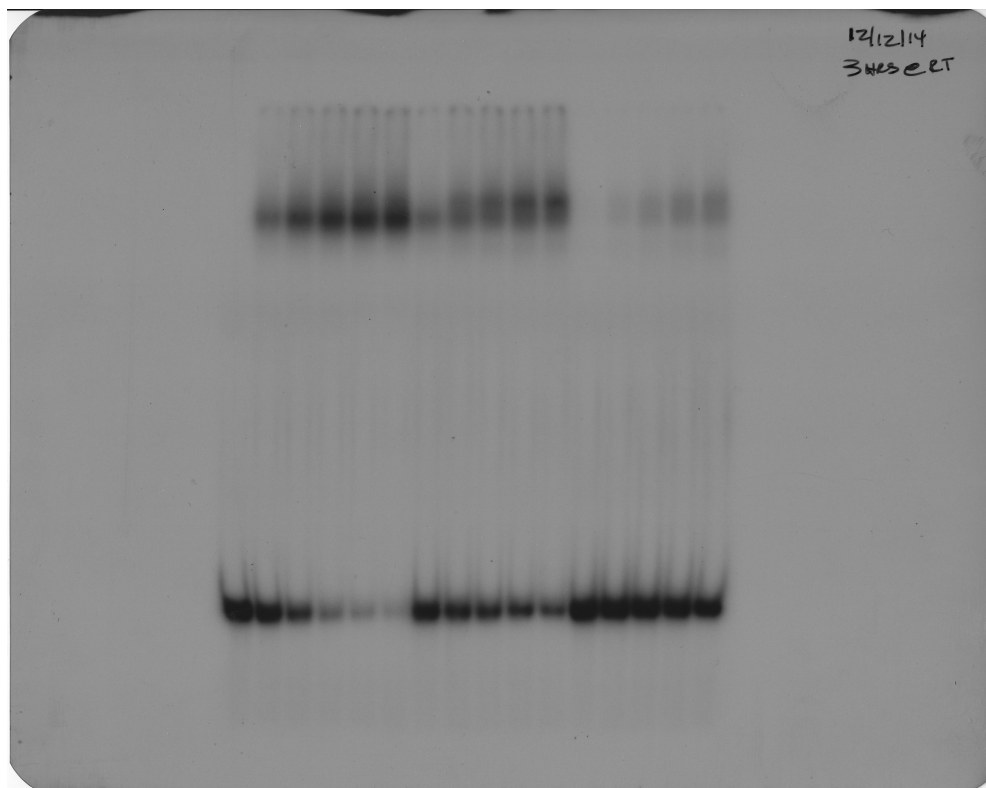

Uncropped Figure 7e

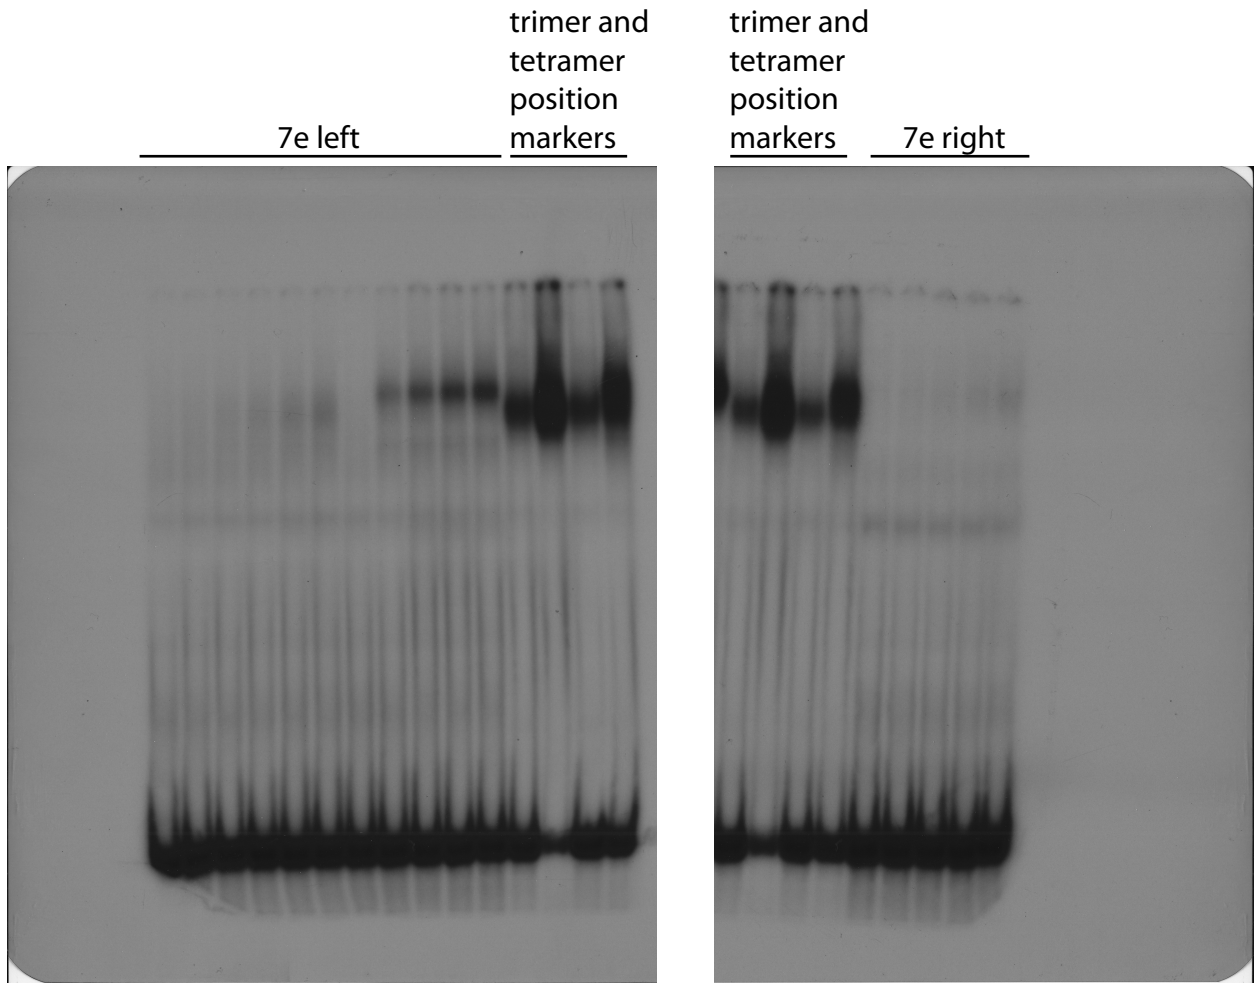

Supplement: NIHMS683749-supplement-2.pdf [file NIHMS683749-supplement-2.pdf]
